# Supplementary material for: Geochemical Insight into CO2 Migration in a Faulted Caprock
Source: Research Square preprint supplement (doi:10.21203/rs.3.rs-2386526/v1), 2022-12-22
Supplement: Supplementary file [file 091258bea503c7dcb428a0b4.pdf]

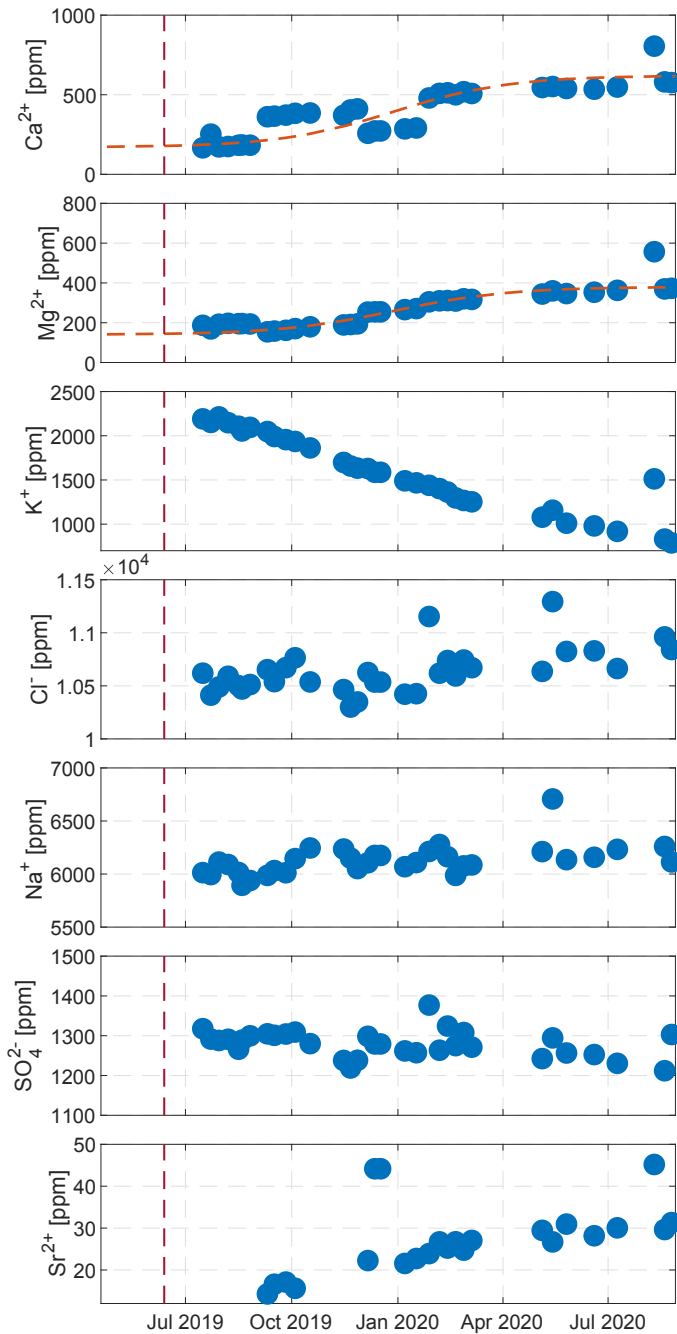

**Fig. 2** Ion concentrations. Concentrations during the course of the experiment of [a] Ca, [b] Mg, [c] K, [d] Cl, [e] Na, [f] SO<sub>4</sub>, [g] Sr. For Ca and Mg idealized lines are drawn in red. For Cl, Na and SO<sub>4</sub> the third last data point lies outside of the depicted range.
